# Supplementary material
Source: publisher figshare collection journal article supplement (https://tandf.figshare.com/ndownloader/files/14078339)
Supplement: Supplementary file 1 [file 14078339]

| **Appendix 1 - Sample MEDLINE search** |
| --- |
| Database: PubMed  Search date: 24/02/2015  Retrieval: 1523  Search strategy:   | 1. Search ((self-reflection[Title/Abstract]) OR reflection[Title/Abstract]) OR reflective[Title/Abstract] 2. Search "Narration"[Mesh] 3. Search (narration[Title/Abstract]) OR narrative[Title/Abstract] 4. Search (((((self-reflection[Title/Abstract]) OR reflection[Title/Abstract]) OR reflective[Title/Abstract])) OR "Narration"[Mesh]) OR ((narration[Title/Abstract]) OR narrative[Title/Abstract]) 5. Search "Education, Medical, Undergraduate"[Mesh] 6. Search "Students, Medical"[Mesh] 7. Search "Education, Medical/methods"[Mesh] 8. Search (medical[Title/Abstract]) OR medicine[Title/Abstract] 9. Search ((undergraduate*[Title/Abstract]) OR under-graduate*[Title/Abstract]) OR student* 10. Search (((medical[Title/Abstract]) OR medicine[Title/Abstract])) AND (((undergraduate*[Title/Abstract]) OR under-graduate*[Title/Abstract]) OR student*) 11. Search ((("Education, Medical, Undergraduate"[Mesh]) OR "Students, Medical"[Mesh]) OR "Education, Medical/methods"[Mesh]) OR ((((medical[Title/Abstract]) OR medicine[Title/Abstract])) AND (((undergraduate*[Title/Abstract]) OR under-graduate*[Title/Abstract]) OR student*)) 12. Search (((((((self-reflection[Title/Abstract]) OR reflection[Title/Abstract]) OR reflective[Title/Abstract])) OR "Narration"[Mesh]) OR ((narration[Title/Abstract]) OR narrative[Title/Abstract]))) AND (((("Education, Medical, Undergraduate"[Mesh]) OR "Students, Medical"[Mesh]) OR "Education, Medical/methods"[Mesh]) OR ((((medical[Title/Abstract]) OR medicine[Title/Abstract])) AND (((undergraduate*[Title/Abstract]) OR under-graduate*[Title/Abstract]) OR student*))) 13. Search (((((((((nurs*[Title/Abstract]) OR midwifery[Title/Abstract]) OR pharmacy[Title/Abstract]) OR physiotherapy[Title/Abstract]) OR dental[Title/Abstract]) OR dentist*[Title/Abstract]) OR veterinary[Title/Abstract]) OR psychology[Title/Abstract]) OR dietetics[Title/Abstract]) OR dietician*[Title/Abstract] 14. Search (((((((((self-reflection[Title/Abstract]) OR reflection[Title/Abstract]) OR reflective[Title/Abstract])) OR "Narration"[Mesh]) OR ((narration[Title/Abstract]) OR narrative[Title/Abstract]))) AND (((("Education, Medical, Undergraduate"[Mesh]) OR "Students, Medical"[Mesh]) OR "Education, Medical/methods"[Mesh]) OR ((((medical[Title/Abstract]) OR medicine[Title/Abstract])) AND (((undergraduate*[Title/Abstract]) OR under-graduate*[Title/Abstract]) OR student*))))) NOT ((((((((((nurs*[Title/Abstract]) OR midwifery[Title/Abstract]) OR pharmacy[Title/Abstract]) OR physiotherapy[Title/Abstract]) OR dental[Title/Abstract]) OR dentist*[Title/Abstract]) OR veterinary[Title/Abstract]) OR psychology[Title/Abstract]) OR dietetics[Title/Abstract]) OR dietician*[Title/Abstract]) | | --- | |
